# Supplementary material
Source: PubMed Central journal article supplement (PMC5744185)
Supplement: ci7b00521_si_001.pdf [file ci7b00521_si_001.pdf]

# Iodide Binding in Sodium-Coupled Cotransporters

Ariela Vergara-Jaque<sup>1,2\*</sup>, Peking Fong<sup>3</sup> and Jeffrey Comer<sup>2,3\*</sup>

<sup>1</sup>Center for Bioinformatics and Molecular Simulation, Universidad de Talca, 2 Norte 685,  
Talca 3460000, Chile.

<sup>2</sup>Institute of Computational Comparative Medicine, Nanotechnology Innovation Center of Kansas  
State, Kansas State University, Manhattan, Kansas 66506, United States.

<sup>3</sup>Department of Anatomy and Physiology, Kansas State University College of Veterinary Medicine,  
Manhattan, Kansas 66506, United States.

\* To whom correspondence should be addressed: E-mail: [arvergara@utalca.cl](mailto:arvergara@utalca.cl) and [jeffcomer@ksu.edu](mailto:jeffcomer@ksu.edu). Telephone: +56-71-2203041 and +1-785-532-6311.

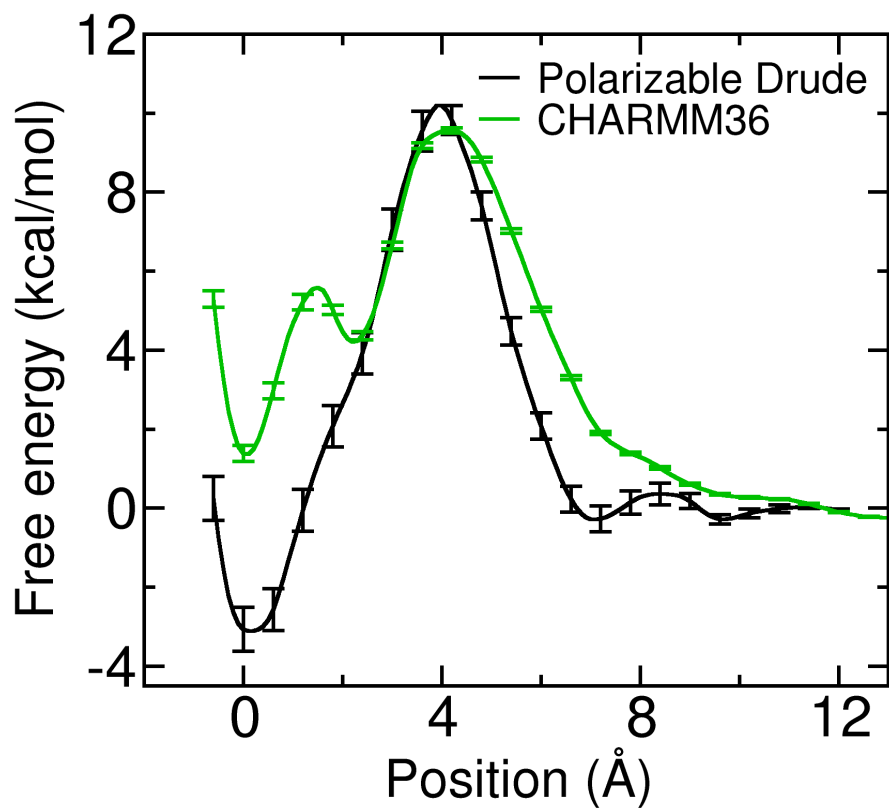

**Figure S1:** Importance of the using the Drude force field, which includes atomic polarizability, in the calculations described in the main text. The black curve shows the potential of mean force for iodide in a fragment of hNIS WT, presented in Fig. 6B of the main text. The green curve is the potential of mean force for an analogous system using the CHARMM36 force field, which does not represent atomic polarizability.

## Gradient of free energy (ABF hNIS WT/Iodide)

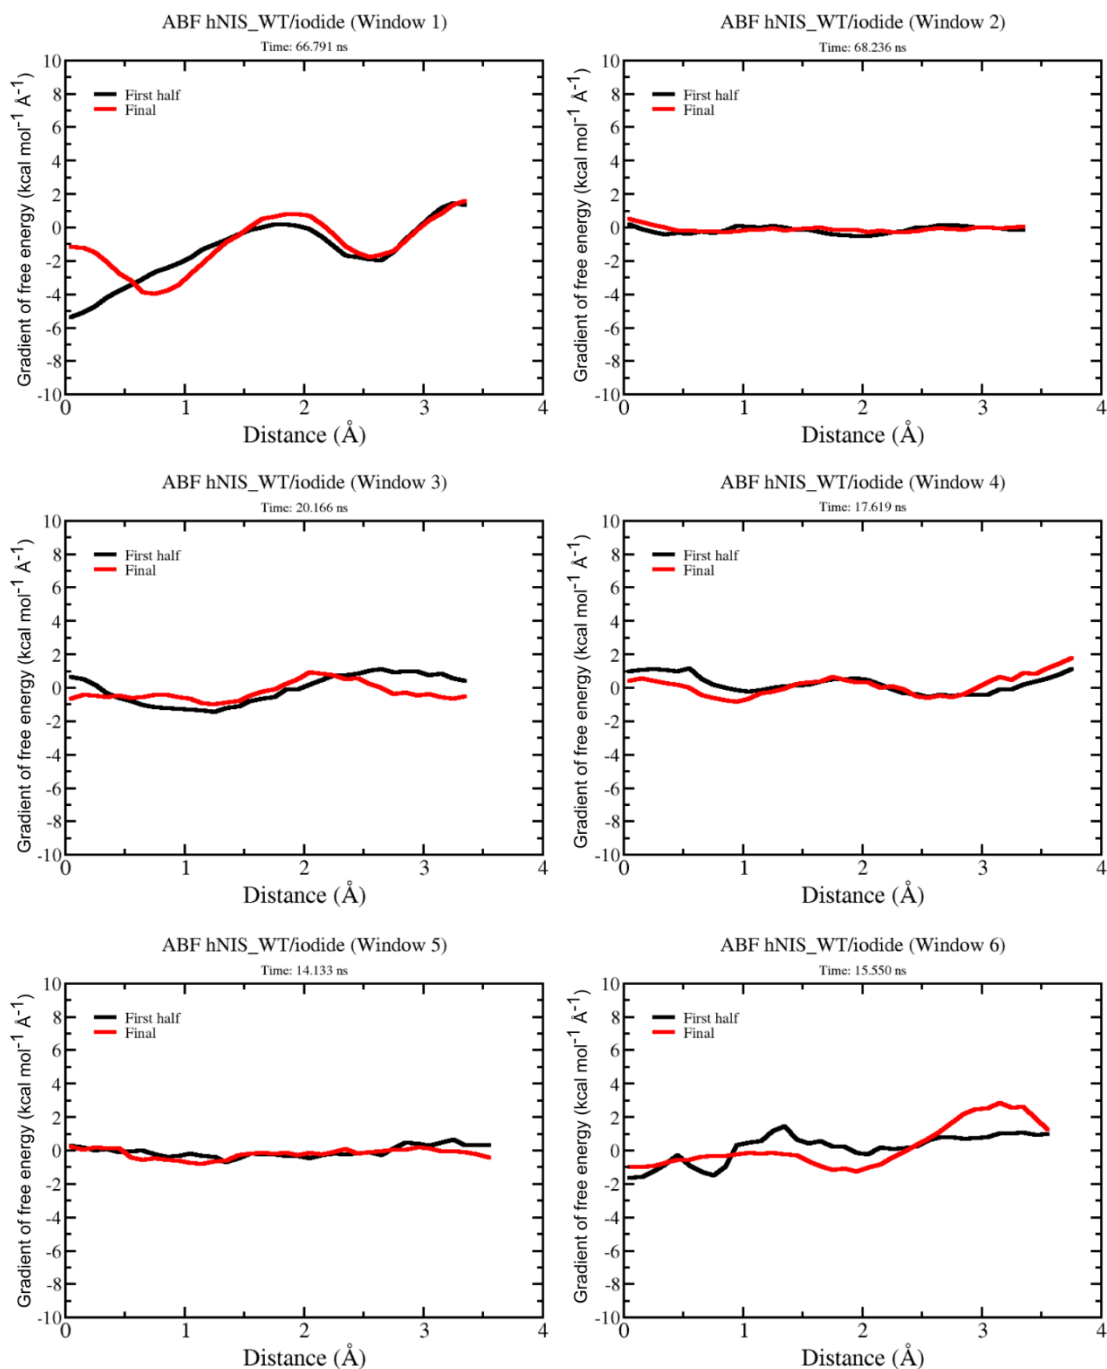

**Figure S2:** Convergence of the ABF calculations for wild-type hNIS interacting with iodide. The converged mean force was evaluated by comparing the gradient of the free energy of the first (black) and second (red) half of the length of the simulation for each of six segments defined along of the transition coordinate. The simulated total time is shown in each case.

## Gradient of free energy (ABF hNIS\_G93T/Iodide)

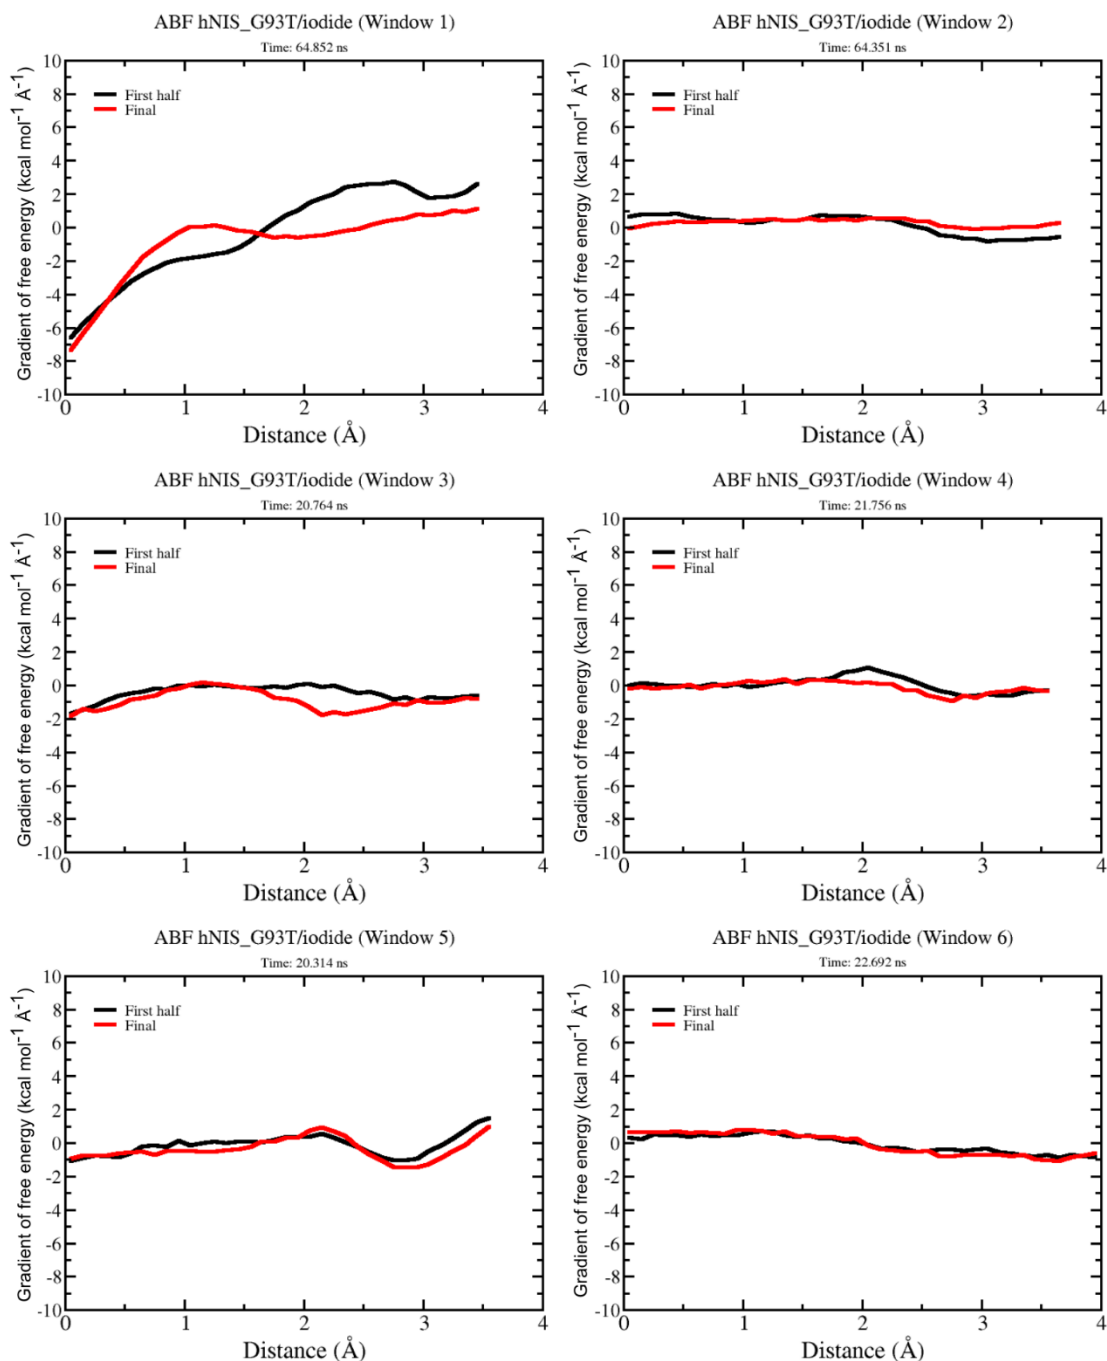

**Figure S3:** Convergence of the ABF calculations for G93T hNIS interacting with iodide. The converged mean force was evaluated by comparing the gradient of the free energy of the first (black) and second (red) half of the length of the simulation for each of six segments defined along of the transition coordinate. The simulated total time is shown in each case.

## Gradient of free energy (ABF hSMCT1\_WT/iodide)

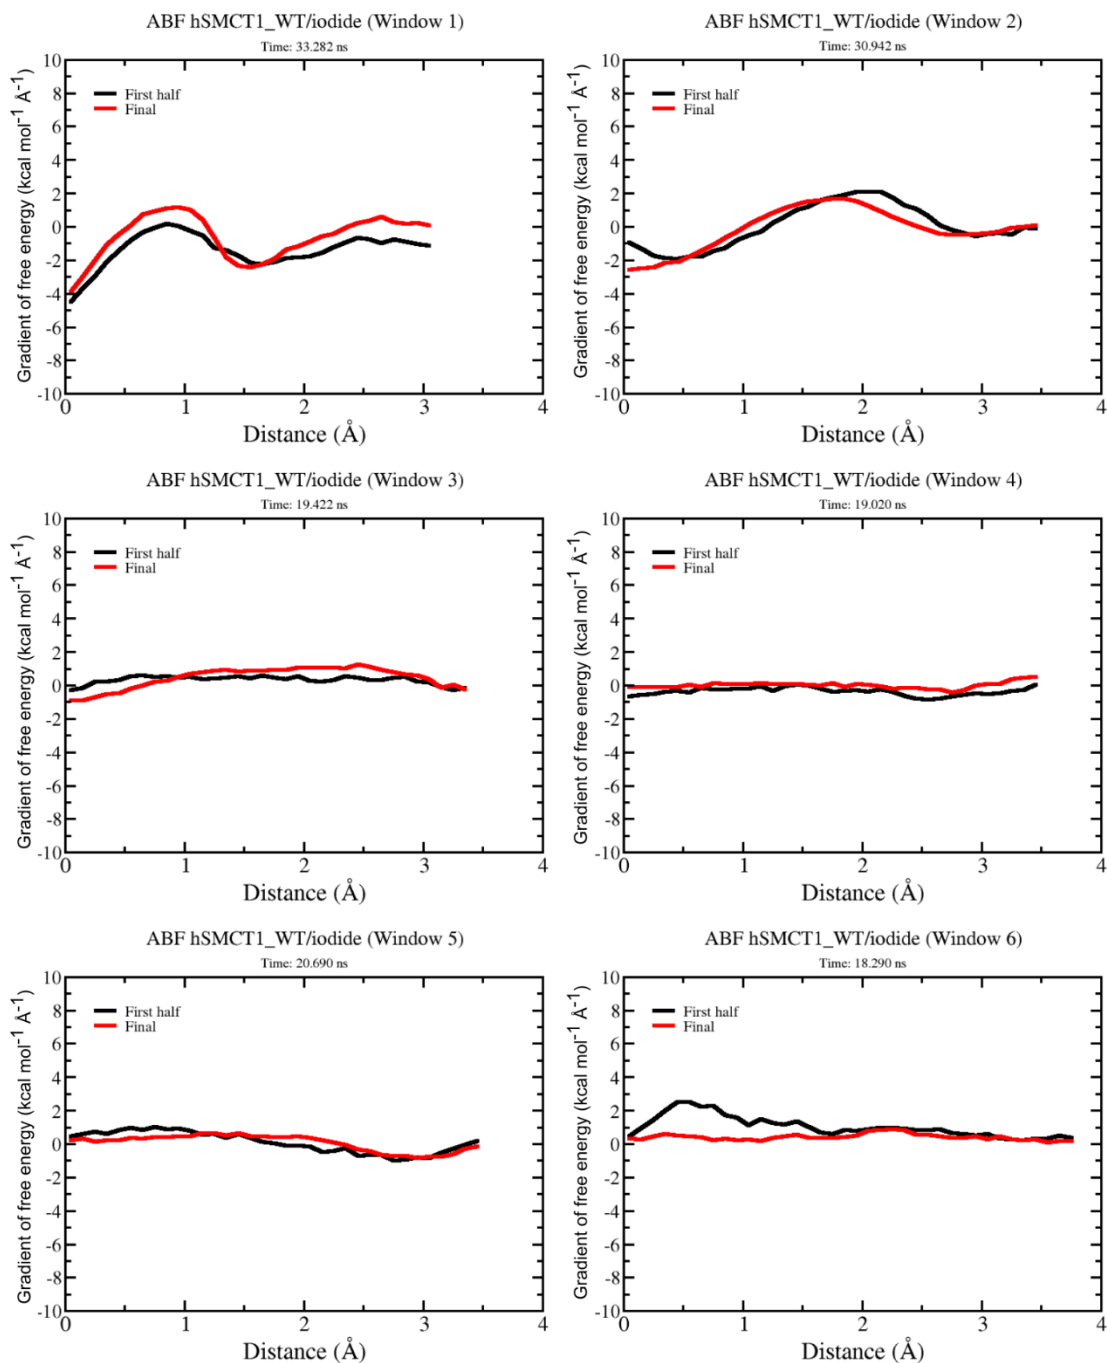

**Figure S4:** Convergence of the ABF calculations for wild-type hSMCT1 interacting with iodide. The converged mean force was evaluated by comparing the gradient of the free energy of the first (black) and second (red) half of the length of the simulation for each of six segments defined along of the transition coordinate. The simulated total time is shown in each case.

## Gradient along the transition coordinate (ABF hSMCT1\_T91G/Iodide)

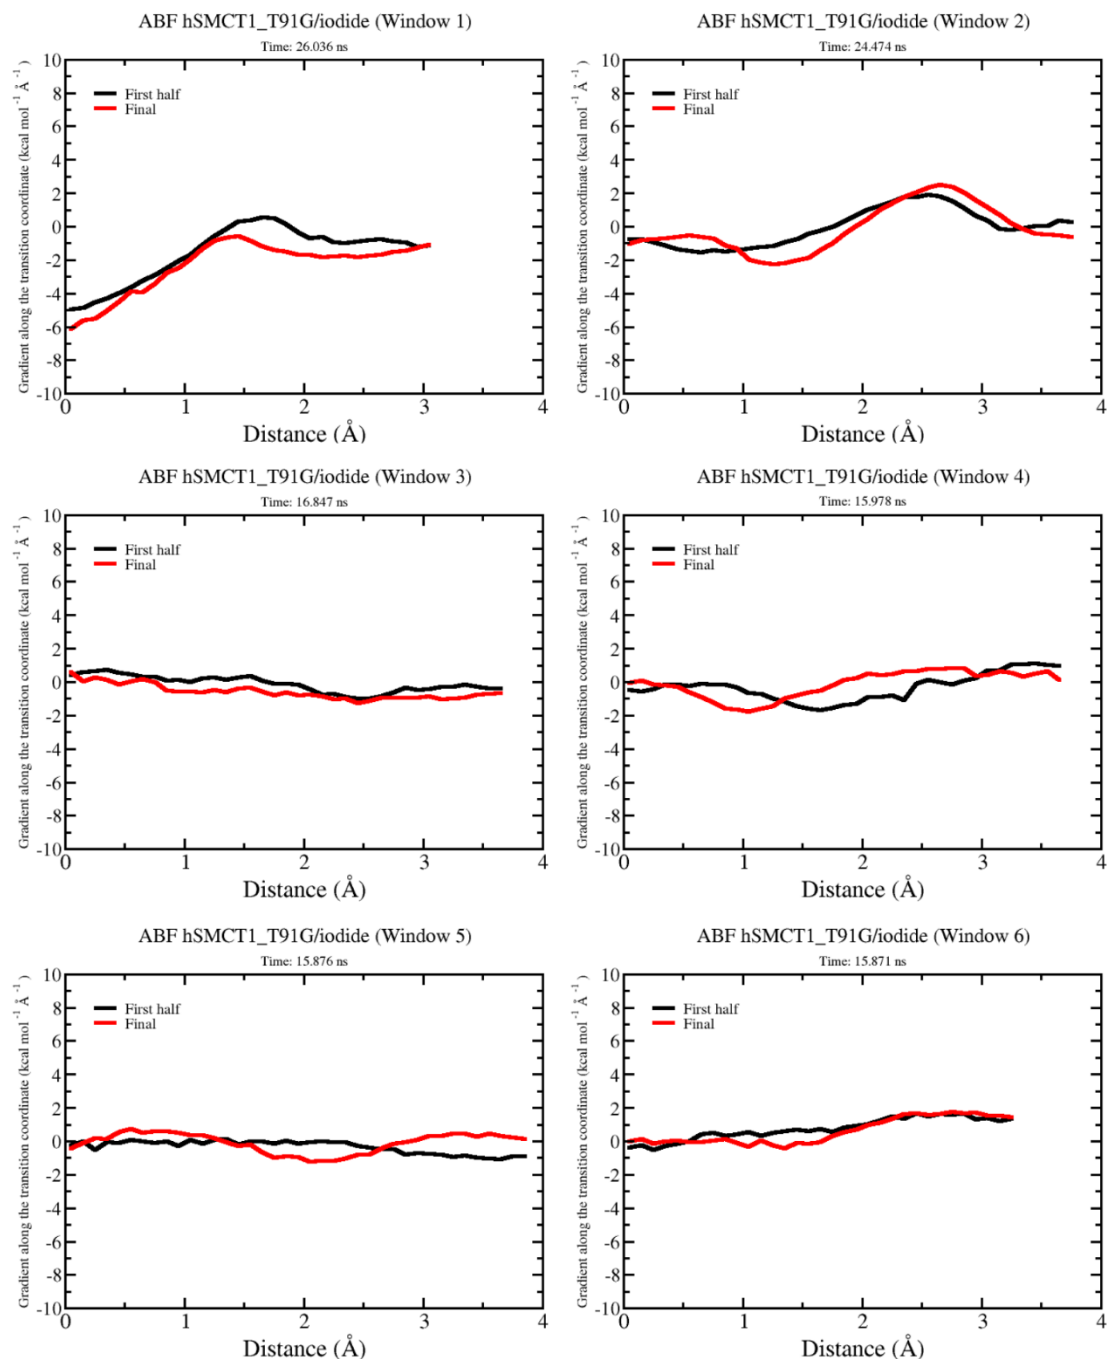

**Figure S5:** Convergence of the ABF calculations for T91G hSMCT1 interacting with iodide. The converged mean force was evaluated by comparing the gradient of the free energy of the first (black) and second (red) half of the length of the simulation for each of six segments defined along the transition coordinate. The simulated total time is shown in each case.
